# Supplementary material for: De Novo Assembly and Discovery of Genes That Are Involved in Drought Tolerance in Tibetan Sophora moorcroftiana
Source: PLoS One. 2015 Jan 5;10(1):e111054. doi: 10.1371/journal.pone.0111054 (PMC4283959; doi:10.1371/journal.pone.0111054)
Supplement: Table S5 — KEGG pathway enrichment results by DEGs from severe stress versus mild stress. (XLS) [file pone.0111054.s005.xls]

##The most enriched pathway or disease terms:
##Statistic method: hypergeometric test
##FDR correction method: Benjamini and Hochberg (1995)
#Term	Database	Id	Sample number	Background number	Ratio	P-Value	Corrected P-Value	Genes	Hyperlink
Ribosome	KEGG PATHWAY	ko03010	94	401	0.234413965	5.35E-08	1.18E-05	comp15982_c0|comp31845_c0|comp23235_c0|comp27122_c0|comp44559_c1|comp42409_c0|comp78893_c0|comp16367_c0|comp95200_c0|comp16143_c0|comp39899_c0|comp101397_c0|comp27111_c0|comp43013_c0|comp87861_c0|comp37202_c0|comp31060_c0|comp19652_c0|comp67502_c0|comp28573_c0|comp33486_c0|comp33667_c0|comp47177_c0|comp64317_c0|comp42737_c0|comp63938_c0|comp39811_c0|comp33705_c0|comp16051_c0|comp32918_c0|comp3409…	http://www.genome.jp/kegg-bin/show_pathway?ko03010
Plant hormone signal transduction	KEGG PATHWAY	ko04075	44	170	0.258823529	1.42E-05	0.001557066	comp45415_c0|comp30278_c0|comp42869_c0|comp43568_c1|comp47944_c2|comp41349_c0|comp40020_c0|comp17911_c0|comp85213_c0|comp43908_c0|comp44452_c0|comp32928_c0|comp30967_c0|comp39813_c0|comp41280_c0|comp47802_c3|comp44775_c0|comp48127_c0|comp48256_c3|comp35515_c0|comp23443_c0|comp45583_c0|comp31032_c1|comp40631_c0|comp36970_c0|comp42012_c0|comp42012_c1|comp41764_c1|comp36077_c0|comp37352_c0|comp38587…	http://www.genome.jp/kegg-bin/show_pathway?ko04075
alpha-Linolenic acid metabolism	KEGG PATHWAY	ko00592	18	51	0.352941176	7.66E-05	0.00561661	comp42383_c0|comp39676_c0|comp40740_c0|comp46420_c0|comp43951_c0|comp44772_c1|comp35570_c0|comp48067_c0|comp37259_c0|comp45936_c0|comp16106_c0|comp47580_c2|comp45623_c0|comp16106_c1|comp30412_c0|comp42503_c0|comp43556_c0|comp47011_c0	http://www.genome.jp/kegg-bin/show_pathway?ko00592
Biosynthesis of secondary metabolites	KEGG PATHWAY	ko01110	189	1125	0.168	0.000981045	0.05395748	comp39346_c0|comp38720_c0|comp43553_c0|comp42934_c0|comp33231_c0|comp46839_c0|comp43696_c1|comp45629_c0|comp34390_c1|comp48187_c2|comp40789_c1|comp48015_c0|comp24401_c0|comp34310_c0|comp47966_c0|comp32915_c0|comp28077_c0|comp42256_c0|comp43589_c1|comp44584_c0|comp48323_c1|comp42812_c0|comp35206_c0|comp43568_c0|comp38771_c1|comp38771_c0|comp35174_c0|comp29335_c0|comp41759_c1|comp36113_c1|comp20975…	http://www.genome.jp/kegg-bin/show_pathway?ko01110
Arginine and proline metabolism	KEGG PATHWAY	ko00330	27	116	0.232758621	0.003247351	0.118126501	comp39821_c0|comp24936_c0|comp46597_c0|comp41340_c0|comp43696_c0|comp20477_c0|comp27076_c1|comp27076_c0|comp47506_c0|comp37760_c0|comp24220_c1|comp120063_c0|comp45719_c0|comp44351_c0|comp47459_c0|comp43016_c0|comp29335_c0|comp48467_c0|comp27700_c0|comp89665_c0|comp40760_c0|comp25569_c0|comp33512_c0|comp30885_c0|comp32640_c1|comp45761_c0|comp24772_c1	http://www.genome.jp/kegg-bin/show_pathway?ko00330
Antigen processing and presentation	KEGG PATHWAY	ko04612	22	89	0.247191011	0.003456588	0.118126501	comp26575_c0|comp44141_c0|comp40486_c1|comp23229_c0|comp46169_c1|comp46169_c0|comp35814_c0|comp37753_c0|comp100044_c0|comp31905_c1|comp31905_c0|comp40194_c0|comp41160_c0|comp2128_c0|comp39629_c0|comp56732_c0|comp31982_c0|comp31498_c0|comp19302_c1|comp36594_c0|comp48886_c0|comp92974_c0	http://www.genome.jp/kegg-bin/show_pathway?ko04612
Porphyrin and chlorophyll metabolism	KEGG PATHWAY	ko00860	16	58	0.275862069	0.00375857	0.118126501	comp43981_c0|comp42598_c0|comp47966_c0|comp46865_c0|comp40713_c0|comp45357_c0|comp39019_c0|comp33312_c0|comp34247_c1|comp34247_c0|comp34247_c3|comp47598_c1|comp41235_c0|comp34875_c0|comp37278_c0|comp34366_c0	http://www.genome.jp/kegg-bin/show_pathway?ko00860
Zeatin biosynthesis	KEGG PATHWAY	ko00908	7	21	0.333333333	0.017542779	0.474142158	comp29757_c1|comp48007_c2|comp17959_c0|comp43794_c0|comp47983_c1|comp19898_c0|comp37319_c0	http://www.genome.jp/kegg-bin/show_pathway?ko00908
Ascorbate and aldarate metabolism	KEGG PATHWAY	ko00053	13	54	0.240740741	0.026676235	0.474142158	comp33512_c0|comp41850_c0|comp35892_c0|comp35892_c1|comp48195_c4|comp39436_c4|comp35174_c0|comp120063_c0|comp46013_c0|comp38831_c0|comp44351_c0|comp32183_c0|comp29335_c0	http://www.genome.jp/kegg-bin/show_pathway?ko00053
Linoleic acid metabolism	KEGG PATHWAY	ko00591	6	18	0.333333333	0.027344123	0.474142158	comp39676_c0|comp46420_c0|comp30412_c0|comp37259_c0|comp23565_c2|comp39569_c0	http://www.genome.jp/kegg-bin/show_pathway?ko00591
Two-component system	KEGG PATHWAY	ko02020	10	38	0.263157895	0.027486646	0.474142158	comp22377_c0|comp24936_c0|comp33402_c0|comp25923_c0|comp32640_c1|comp41283_c1|comp41283_c0|comp25569_c0|comp20477_c0|comp46583_c0	http://www.genome.jp/kegg-bin/show_pathway?ko02020
Chloroalkane and chloroalkene degradation	KEGG PATHWAY	ko00625	9	33	0.272727273	0.02859338	0.474142158	comp33512_c0|comp40017_c0|comp29335_c0|comp41483_c0|comp39174_c0|comp45629_c0|comp46482_c0|comp120063_c0|comp44351_c0	http://www.genome.jp/kegg-bin/show_pathway?ko00625
Steroid biosynthesis	KEGG PATHWAY	ko00100	7	23	0.304347826	0.028992437	0.474142158	comp39676_c0|comp43284_c0|comp44662_c0|comp47785_c0|comp47242_c0|comp33192_c0|comp45186_c0	http://www.genome.jp/kegg-bin/show_pathway?ko00100
Carbon fixation in photosynthetic organisms	KEGG PATHWAY	ko00710	18	84	0.214285714	0.032139697	0.474142158	comp32915_c0|comp39821_c0|comp91477_c0|comp21508_c0|comp41282_c0|comp101824_c0|comp41217_c0|comp37311_c0|comp32562_c0|comp39663_c0|comp17699_c0|comp42627_c0|comp38156_c0|comp39436_c2|comp37629_c0|comp42456_c2|comp34580_c0|comp42456_c0	http://www.genome.jp/kegg-bin/show_pathway?ko00710
Glutathione metabolism	KEGG PATHWAY	ko00480	25	126	0.198412698	0.03247461	0.474142158	comp32418_c0|comp47358_c2|comp43016_c0|comp17650_c0|comp17650_c1|comp36682_c0|comp34669_c0|comp17719_c0|comp45497_c0|comp42505_c1|comp33928_c0|comp17654_c0|comp36494_c0|comp41345_c0|comp24220_c1|comp42505_c0|comp27700_c0|comp23690_c0|comp44070_c0|comp32183_c0|comp44532_c0|comp14231_c0|comp23520_c0|comp45975_c0|comp48259_c0	http://www.genome.jp/kegg-bin/show_pathway?ko00480
Nitrogen metabolism	KEGG PATHWAY	ko00910	16	73	0.219178082	0.0345725	0.474142158	comp42862_c0|comp27076_c1|comp45942_c0|comp24936_c0|comp33402_c0|comp47653_c0|comp43201_c0|comp25923_c0|comp46597_c0|comp37517_c0|comp32640_c1|comp41198_c0|comp25569_c0|comp20477_c0|comp27076_c0|comp46583_c0	http://www.genome.jp/kegg-bin/show_pathway?ko00910
Thiamine metabolism	KEGG PATHWAY	ko00730	3	6	0.5	0.036638258	0.474142158	comp33793_c0|comp48572_c0|comp35215_c0	http://www.genome.jp/kegg-bin/show_pathway?ko00730
Naphthalene degradation	KEGG PATHWAY	ko00626	5	15	0.333333333	0.043071267	0.497664214	comp46482_c0|comp40017_c0|comp41483_c0|comp45629_c0|comp39174_c0	http://www.genome.jp/kegg-bin/show_pathway?ko00626
Metabolic pathways	KEGG PATHWAY	ko01100	344	2329	0.147702877	0.044581351	0.497664214	comp21460_c0|comp33231_c0|comp46839_c0|comp34371_c0|comp37304_c0|comp43696_c1|comp43696_c0|comp38156_c0|comp41119_c0|comp28077_c0|comp43149_c0|comp42812_c0|comp35174_c0|comp29335_c0|comp41759_c1|comp43649_c1|comp20975_c0|comp39174_c0|comp17687_c0|comp43892_c0|comp48010_c0|comp44473_c0|comp17480_c0|comp36545_c0|comp35580_c0|comp37311_c0|comp39393_c0|comp31581_c0|comp39227_c0|comp46542_c0|comp37863…	http://www.genome.jp/kegg-bin/show_pathway?ko01100
Glycolysis / Gluconeogenesis	KEGG PATHWAY	ko00010	35	194	0.180412371	0.048423138	0.497664214	comp43553_c0|comp42871_c0|comp38978_c0|comp39663_c0|comp45629_c0|comp46482_c0|comp46023_c0|comp42769_c0|comp34310_c0|comp45791_c0|comp40017_c0|comp40885_c0|comp28077_c0|comp42627_c0|comp16637_c0|comp120063_c0|comp42812_c0|comp23468_c0|comp32915_c0|comp38771_c1|comp38771_c0|comp29335_c0|comp41759_c1|comp41483_c0|comp39174_c0|comp46857_c1|comp39436_c2|comp37629_c0|comp33512_c0|comp37243_c0|comp1018…	http://www.genome.jp/kegg-bin/show_pathway?ko00010
Inositol phosphate metabolism	KEGG PATHWAY	ko00562	14	65	0.215384615	0.052380313	0.497664214	comp35892_c0|comp35892_c1|comp44370_c0|comp45686_c0|comp37873_c0|comp18204_c0|comp41975_c0|comp43786_c0|comp39436_c2|comp45523_c0|comp46397_c0|comp45776_c0|comp42960_c0|comp46447_c1	http://www.genome.jp/kegg-bin/show_pathway?ko00562
Glyoxylate and dicarboxylate metabolism	KEGG PATHWAY	ko00630	20	101	0.198019802	0.052519565	0.497664214	comp38720_c0|comp47132_c0|comp91477_c0|comp39407_c0|comp40632_c0|comp34236_c0|comp24936_c0|comp34085_c0|comp46839_c0|comp40833_c0|comp17699_c0|comp46066_c0|comp47653_c0|comp32640_c1|comp41283_c1|comp41283_c0|comp25569_c0|comp40606_c0|comp36545_c0|comp20477_c0	http://www.genome.jp/kegg-bin/show_pathway?ko00630
C5-Branched dibasic acid metabolism	KEGG PATHWAY	ko00660	3	7	0.428571429	0.057726268	0.497664214	comp37241_c0|comp39847_c0|comp31155_c0	http://www.genome.jp/kegg-bin/show_pathway?ko00660
Sesquiterpenoid and triterpenoid biosynthesis	KEGG PATHWAY	ko00909	3	7	0.428571429	0.057726268	0.497664214	comp42223_c0|comp37444_c0|comp48127_c1	http://www.genome.jp/kegg-bin/show_pathway?ko00909
Drug metabolism	KEGG PATHWAY	ko00982	14	66	0.212121212	0.058486689	0.497664214	comp32418_c0|comp23690_c0|comp40017_c0|comp17719_c0|comp41483_c0|comp17650_c0|comp17650_c1|comp14231_c0|comp39174_c0|comp33928_c0|comp45629_c0|comp46482_c0|comp41345_c0|comp34669_c0	http://www.genome.jp/kegg-bin/show_pathway?ko00982
Glycerolipid metabolism	KEGG PATHWAY	ko00561	17	84	0.202380952	0.058814862	0.497664214	comp33512_c0|comp39676_c0|comp36083_c0|comp44351_c0|comp39269_c0|comp35580_c0|comp37863_c0|comp45748_c0|comp46377_c0|comp42022_c0|comp120063_c0|comp35034_c0|comp35479_c1|comp34833_c0|comp43380_c0|comp29335_c0|comp41915_c0	http://www.genome.jp/kegg-bin/show_pathway?ko00561
PPAR signaling pathway	KEGG PATHWAY	ko03320	16	79	0.202531646	0.064992129	0.518893408	comp40740_c0|comp85098_c0|comp84922_c0|comp34833_c0|comp108023_c0|comp35570_c0|comp39626_c1|comp39626_c0|comp33104_c0|comp34644_c0|comp45229_c0|comp45623_c0|comp44701_c0|comp45890_c0|comp33964_c0|comp41717_c0	http://www.genome.jp/kegg-bin/show_pathway?ko03320
Methane metabolism	KEGG PATHWAY	ko00680	25	135	0.185185185	0.066040979	0.518893408	comp43553_c0|comp42871_c0|comp33231_c0|comp46839_c0|comp40264_c0|comp31047_c0|comp46482_c0|comp38534_c0|comp34580_c0|comp47132_c0|comp31133_c0|comp45791_c0|comp40017_c0|comp40885_c0|comp37629_c0|comp38771_c1|comp38771_c0|comp34236_c0|comp38250_c0|comp40606_c0|comp46023_c0|comp40833_c0|comp32562_c0|comp21508_c0|comp41302_c0	http://www.genome.jp/kegg-bin/show_pathway?ko00680
Plant-pathogen interaction	KEGG PATHWAY	ko04626	25	136	0.183823529	0.070879658	0.537707751	comp41807_c0|comp36010_c0|comp145380_c0|comp34833_c0|comp46562_c0|comp40970_c0|comp47802_c3|comp24643_c1|comp47149_c8|comp17526_c0|comp31905_c1|comp31032_c1|comp41782_c1|comp31905_c0|comp40827_c0|comp38034_c0|comp73377_c0|comp26430_c0|comp27808_c0|comp48426_c0|comp20463_c0|comp45232_c0|comp38264_c0|comp36098_c0|comp42553_c0	http://www.genome.jp/kegg-bin/show_pathway?ko04626
Tyrosine metabolism	KEGG PATHWAY	ko00350	12	57	0.210526316	0.079670653	0.584251457	comp43715_c0|comp39821_c0|comp40017_c0|comp45600_c0|comp47032_c3|comp37760_c0|comp41483_c0|comp39174_c0|comp47603_c0|comp33601_c0|comp45629_c0|comp46482_c0	http://www.genome.jp/kegg-bin/show_pathway?ko00350
Microbial metabolism in diverse environments	KEGG PATHWAY	ko01120	91	583	0.156089194	0.088060655	0.61268296	comp43553_c0|comp42934_c0|comp33231_c0|comp46839_c0|comp45629_c0|comp38156_c0|comp34580_c0|comp34310_c0|comp28077_c0|comp33601_c0|comp44584_c0|comp38771_c1|comp38771_c0|comp29335_c0|comp43638_c0|comp37243_c0|comp39025_c0|comp39174_c0|comp46857_c1|comp39436_c2|comp24401_c0|comp41282_c0|comp40632_c0|comp32915_c0|comp21508_c0|comp41302_c0|comp25569_c0|comp31303_c0|comp36545_c0|comp38978_c0|comp46482…	http://www.genome.jp/kegg-bin/show_pathway?ko01120
Phototransduction	KEGG PATHWAY	ko04744	4	13	0.307692308	0.089117521	0.61268296	comp36010_c0|comp20463_c0|comp73377_c0|comp43811_c1	http://www.genome.jp/kegg-bin/show_pathway?ko04744
Sulfur metabolism	KEGG PATHWAY	ko00920	8	35	0.228571429	0.094256881	0.616626052	comp43638_c0|comp32869_c0|comp39562_c1|comp40450_c0|comp40904_c1|comp17713_c0|comp72217_c0|comp42658_c0	http://www.genome.jp/kegg-bin/show_pathway?ko00920
Metabolism of xenobiotics by cytochrome P450	KEGG PATHWAY	ko00980	14	71	0.197183099	0.096143036	0.616626052	comp32418_c0|comp23690_c0|comp40017_c0|comp17719_c0|comp41483_c0|comp17650_c0|comp17650_c1|comp14231_c0|comp39174_c0|comp33928_c0|comp45629_c0|comp46482_c0|comp41345_c0|comp34669_c0	http://www.genome.jp/kegg-bin/show_pathway?ko00980
Terpenoid backbone biosynthesis	KEGG PATHWAY	ko00900	12	59	0.203389831	0.098099599	0.616626052	comp48225_c0|comp32557_c1|comp37091_c0|comp40027_c0|comp43968_c0|comp36113_c1|comp41752_c0|comp37597_c0|comp47414_c0|comp41283_c1|comp41283_c0|comp43300_c0	http://www.genome.jp/kegg-bin/show_pathway?ko00900
Starch and sucrose metabolism	KEGG PATHWAY	ko00500	34	201	0.169154229	0.104815039	0.62799104	comp24339_c0|comp48187_c2|comp42694_c0|comp39615_c0|comp37304_c0|comp47937_c0|comp31592_c1|comp27091_c0|comp48286_c0|comp39393_c0|comp35205_c1|comp40043_c0|comp42125_c0|comp48323_c1|comp36641_c0|comp40511_c1|comp43649_c1|comp35205_c0|comp44307_c1|comp46857_c1|comp39353_c0|comp46344_c0|comp37812_c0|comp30836_c0|comp46821_c0|comp44473_c0|comp17480_c0|comp44067_c0|comp43323_c0|comp47651_c0|comp46425…	http://www.genome.jp/kegg-bin/show_pathway?ko00500
Valine, leucine and isoleucine biosynthesis	KEGG PATHWAY	ko00290	5	19	0.263157895	0.105616675	0.62799104	comp37241_c0|comp32099_c0|comp39847_c0|comp31155_c0|comp43962_c0	http://www.genome.jp/kegg-bin/show_pathway?ko00290
Amino sugar and nucleotide sugar metabolism	KEGG PATHWAY	ko00520	25	145	0.172413793	0.12548396	0.726486086	comp42694_c0|comp39615_c0|comp24419_c0|comp46858_c0|comp47937_c0|comp27091_c0|comp22192_c0|comp35034_c0|comp40043_c0|comp39227_c0|comp40517_c0|comp48323_c1|comp43626_c0|comp45601_c0|comp31636_c0|comp31636_c1|comp40511_c1|comp33645_c1|comp46857_c1|comp44473_c0|comp41850_c0|comp38626_c0|comp37812_c0|comp43848_c0|comp48195_c4	http://www.genome.jp/kegg-bin/show_pathway?ko00520
Fatty acid metabolism	KEGG PATHWAY	ko00071	19	107	0.177570093	0.134555007	0.759028246	comp33512_c0|comp20975_c0|comp41483_c0|comp29335_c0|comp40740_c0|comp47580_c2|comp44701_c0|comp35570_c0|comp41283_c1|comp39174_c0|comp45229_c0|comp45623_c0|comp45629_c0|comp46482_c0|comp120063_c0|comp41283_c0|comp45890_c0|comp44351_c0|comp40017_c0	http://www.genome.jp/kegg-bin/show_pathway?ko00071
Phosphatidylinositol signaling system	KEGG PATHWAY	ko04070	12	63	0.19047619	0.141980972	0.776894722	comp45686_c0|comp45776_c0|comp44370_c0|comp18204_c0|comp41975_c0|comp20463_c0|comp43786_c0|comp45523_c0|comp46397_c0|comp36010_c0|comp73377_c0|comp46447_c1	http://www.genome.jp/kegg-bin/show_pathway?ko04070
Limonene and pinene degradation	KEGG PATHWAY	ko00903	5	21	0.238095238	0.147626134	0.776894722	comp39434_c0|comp33512_c0|comp44351_c0|comp29335_c0|comp120063_c0	http://www.genome.jp/kegg-bin/show_pathway?ko00903
Cysteine and methionine metabolism	KEGG PATHWAY	ko00270	18	102	0.176470588	0.148316265	0.776894722	comp18282_c0|comp33761_c0|comp39821_c0|comp43395_c0|comp45363_c0|comp47032_c3|comp32869_c0|comp24772_c1|comp37760_c0|comp43016_c0|comp39562_c1|comp40450_c0|comp43892_c0|comp72217_c0|comp29670_c0|comp40789_c1|comp17713_c0|comp17578_c0	http://www.genome.jp/kegg-bin/show_pathway?ko00270
Pentose and glucuronate interconversions	KEGG PATHWAY	ko00040	14	77	0.181818182	0.15734214	0.805006299	comp33512_c0|comp41850_c0|comp29335_c0|comp32572_c0|comp44307_c1|comp42182_c1|comp48323_c1|comp42254_c0|comp43131_c0|comp120063_c0|comp27369_c0|comp44351_c0|comp48195_c4|comp30836_c0	http://www.genome.jp/kegg-bin/show_pathway?ko00040
Biotin metabolism	KEGG PATHWAY	ko00780	4	16	0.25	0.163905202	0.819526008	comp38103_c0|comp17687_c0|comp45910_c0|comp42661_c1	http://www.genome.jp/kegg-bin/show_pathway?ko00780
Tropane, piperidine and pyridine alkaloid biosynthesis	KEGG PATHWAY	ko00960	6	28	0.214285714	0.172694322	0.844283351	comp39821_c0|comp47032_c3|comp37760_c0|comp47603_c0|comp43696_c1|comp28660_c1	http://www.genome.jp/kegg-bin/show_pathway?ko00960
Pentose phosphate pathway	KEGG PATHWAY	ko00030	14	79	0.17721519	0.181444286	0.867777022	comp46857_c1|comp38110_c0|comp42934_c0|comp47358_c2|comp40885_c0|comp44532_c0|comp39025_c0|comp32562_c0|comp44070_c0|comp21508_c0|comp37629_c0|comp38771_c0|comp38771_c1|comp42871_c0	http://www.genome.jp/kegg-bin/show_pathway?ko00030
Retinol metabolism	KEGG PATHWAY	ko00830	6	29	0.206896552	0.194325044	0.895964218	comp40017_c0|comp42022_c0|comp41483_c0|comp39174_c0|comp45629_c0|comp46482_c0	http://www.genome.jp/kegg-bin/show_pathway?ko00830
Benzoate degradation	KEGG PATHWAY	ko00362	5	23	0.217391304	0.195483102	0.895964218	comp41283_c1|comp41283_c0|comp20975_c0|comp35570_c0|comp40740_c0	http://www.genome.jp/kegg-bin/show_pathway?ko00362
Mineral absorption	KEGG PATHWAY	ko04978	6	30	0.2	0.216905573	0.951313286	comp40034_c0|comp45357_c0|comp101372_c0|comp38724_c0|comp33058_c0|comp33058_c1	http://www.genome.jp/kegg-bin/show_pathway?ko04978
Stilbenoid, diarylheptanoid and gingerol biosynthesis	KEGG PATHWAY	ko00945	3	12	0.25	0.217694559	0.951313286	comp33315_c0|comp39434_c0|comp29276_c0	http://www.genome.jp/kegg-bin/show_pathway?ko00945
Regulation of actin cytoskeleton	KEGG PATHWAY	ko04810	17	102	0.166666667	0.220531716	0.951313286	comp48227_c1|comp45686_c0|comp18615_c0|comp151334_c0|comp43786_c0|comp18204_c0|comp19859_c0|comp41975_c0|comp73226_c0|comp46361_c0|comp85237_c0|comp46397_c0|comp83781_c0|comp21676_c0|comp46447_c1|comp36139_c1|comp36139_c0	http://www.genome.jp/kegg-bin/show_pathway?ko04810
Alanine, aspartate and glutamate metabolism	KEGG PATHWAY	ko00250	15	90	0.166666667	0.238719283	1	comp45942_c0|comp39821_c0|comp27076_c0|comp27076_c1|comp32640_c1|comp47506_c0|comp37760_c0|comp24936_c0|comp30248_c0|comp37311_c0|comp46597_c0|comp39848_c0|comp25569_c0|comp43201_c0|comp20477_c0	http://www.genome.jp/kegg-bin/show_pathway?ko00250
Lysosome	KEGG PATHWAY	ko04142	23	145	0.15862069	0.246638073	1	comp42588_c0|comp26575_c0|comp46043_c0|comp36347_c0|comp91397_c0|comp33058_c0|comp33058_c1|comp41160_c0|comp45601_c0|comp48578_c0|comp39629_c0|comp56732_c0|comp39612_c0|comp44889_c0|comp23475_c0|comp23475_c1|comp41317_c0|comp29772_c0|comp31498_c0|comp19302_c0|comp19302_c1|comp48886_c0|comp92974_c0	http://www.genome.jp/kegg-bin/show_pathway?ko04142
Isoquinoline alkaloid biosynthesis	KEGG PATHWAY	ko00950	4	19	0.210526316	0.254006124	1	comp39821_c0|comp47603_c0|comp37760_c0|comp47032_c3	http://www.genome.jp/kegg-bin/show_pathway?ko00950
Peroxisome	KEGG PATHWAY	ko04146	21	133	0.157894737	0.266097483	1	comp40499_c0|comp40740_c0|comp17610_c0|comp34236_c0|comp35570_c0|comp34085_c0|comp46839_c0|comp48331_c0|comp38643_c0|comp91494_c0|comp45229_c0|comp45623_c0|comp36682_c0|comp41218_c0|comp44701_c0|comp42533_c0|comp43985_c0|comp42505_c0|comp44453_c0|comp42505_c1|comp46066_c0	http://www.genome.jp/kegg-bin/show_pathway?ko04146
Photosynthesis	KEGG PATHWAY	ko00195	9	52	0.173076923	0.272025039	1	comp23566_c0|comp35423_c0|comp41166_c0|comp41119_c0|comp33981_c0|comp40071_c0|comp23519_c0|comp17475_c0|comp34619_c0	http://www.genome.jp/kegg-bin/show_pathway?ko00195
Flavonoid biosynthesis	KEGG PATHWAY	ko00941	5	26	0.192307692	0.275241405	1	comp46379_c0|comp33315_c0|comp39150_c0|comp41215_c0|comp29276_c0	http://www.genome.jp/kegg-bin/show_pathway?ko00941
Phenylalanine, tyrosine and tryptophan biosynthesis	KEGG PATHWAY	ko00400	8	46	0.173913043	0.284805307	1	comp45578_c2|comp47682_c0|comp39821_c0|comp45313_c0|comp47032_c3|comp37760_c0|comp46719_c0|comp32651_c0	http://www.genome.jp/kegg-bin/show_pathway?ko00400
Pyruvate metabolism	KEGG PATHWAY	ko00620	21	135	0.155555556	0.289843551	1	comp32915_c0|comp33512_c0|comp91477_c0|comp38978_c0|comp41282_c0|comp101824_c0|comp42456_c2|comp41217_c0|comp41283_c1|comp43195_c0|comp37143_c0|comp42627_c0|comp38156_c0|comp40044_c0|comp120063_c0|comp41283_c0|comp28077_c0|comp44351_c0|comp34580_c0|comp42456_c0|comp29335_c0	http://www.genome.jp/kegg-bin/show_pathway?ko00620
Valine, leucine and isoleucine degradation	KEGG PATHWAY	ko00280	17	108	0.157407407	0.298424146	1	comp33512_c0|comp20975_c0|comp37873_c0|comp38653_c0|comp29335_c0|comp40740_c0|comp43962_c0|comp35570_c0|comp46542_c0|comp41283_c1|comp28077_c0|comp43227_c0|comp120063_c0|comp41283_c0|comp32099_c0|comp45890_c0|comp44351_c0	http://www.genome.jp/kegg-bin/show_pathway?ko00280
Other glycan degradation	KEGG PATHWAY	ko00511	4	21	0.19047619	0.31862537	1	comp44889_c0|comp91397_c0|comp48068_c0|comp45601_c0	http://www.genome.jp/kegg-bin/show_pathway?ko00511
Pantothenate and CoA biosynthesis	KEGG PATHWAY	ko00770	5	28	0.178571429	0.331597298	1	comp37241_c0|comp46957_c0|comp42446_c0|comp32099_c0|comp43962_c0	http://www.genome.jp/kegg-bin/show_pathway?ko00770
Biosynthesis of unsaturated fatty acids	KEGG PATHWAY	ko01040	9	56	0.160714286	0.351227722	1	comp39346_c0|comp45910_c0|comp40740_c0|comp47584_c0|comp35570_c0|comp38103_c0|comp45623_c0|comp41717_c0|comp42661_c1	http://www.genome.jp/kegg-bin/show_pathway?ko01040
Histidine metabolism	KEGG PATHWAY	ko00340	6	36	0.166666667	0.36537158	1	comp33512_c0|comp29335_c0|comp32041_c0|comp120063_c0|comp35206_c0|comp44351_c0	http://www.genome.jp/kegg-bin/show_pathway?ko00340
Olfactory transduction	KEGG PATHWAY	ko04740	3	16	0.1875	0.374900409	1	comp36010_c0|comp20463_c0|comp73377_c0	http://www.genome.jp/kegg-bin/show_pathway?ko04740
NOD-like receptor signaling pathway	KEGG PATHWAY	ko04621	5	30	0.166666667	0.388853706	1	comp145380_c0|comp36098_c0|comp31905_c0|comp31905_c1|comp48426_c0	http://www.genome.jp/kegg-bin/show_pathway?ko04621
Fatty acid elongation	KEGG PATHWAY	ko00062	9	58	0.155172414	0.392022306	1	comp39346_c0|comp42588_c0|comp47584_c0|comp46548_c1|comp20975_c0|comp40843_c0|comp43589_c1|comp40160_c0|comp109863_c0	http://www.genome.jp/kegg-bin/show_pathway?ko00062
D-Glutamine and D-glutamate metabolism	KEGG PATHWAY	ko00471	2	10	0.2	0.404063836	1	comp27076_c1|comp27076_c0	http://www.genome.jp/kegg-bin/show_pathway?ko00471
Arachidonic acid metabolism	KEGG PATHWAY	ko00590	4	24	0.166666667	0.416908027	1	comp41626_c0|comp32575_c0|comp39676_c0|comp23520_c0	http://www.genome.jp/kegg-bin/show_pathway?ko00590
Calcium signaling pathway	KEGG PATHWAY	ko04020	12	81	0.148148148	0.424574633	1	comp91047_c0|comp29646_c2|comp39603_c0|comp44370_c0|comp35235_c0|comp20463_c0|comp41155_c0|comp29646_c0|comp36010_c0|comp73377_c0|comp33484_c0|comp42978_c0	http://www.genome.jp/kegg-bin/show_pathway?ko04020
Fructose and mannose metabolism	KEGG PATHWAY	ko00051	11	74	0.148648649	0.42728016	1	comp42871_c0|comp32562_c0|comp40885_c0|comp21508_c0|comp39436_c2|comp38771_c1|comp42254_c0|comp37629_c0|comp33749_c0|comp43626_c0|comp38771_c0	http://www.genome.jp/kegg-bin/show_pathway?ko00051
Cyanoamino acid metabolism	KEGG PATHWAY	ko00460	6	39	0.153846154	0.442401431	1	comp47132_c0|comp43323_c0|comp40833_c0|comp40606_c0|comp48286_c0|comp17713_c0	http://www.genome.jp/kegg-bin/show_pathway?ko00460
GABAergic synapse	KEGG PATHWAY	ko04727	6	39	0.153846154	0.442401431	1	comp24936_c0|comp43811_c1|comp32640_c1|comp25569_c0|comp87556_c0|comp20477_c0	http://www.genome.jp/kegg-bin/show_pathway?ko04727
beta-Alanine metabolism	KEGG PATHWAY	ko00410	11	75	0.146666667	0.445633052	1	comp33512_c0|comp20975_c0|comp42446_c0|comp29335_c0|comp46957_c0|comp43016_c0|comp47603_c0|comp120063_c0|comp37873_c0|comp45890_c0|comp44351_c0	http://www.genome.jp/kegg-bin/show_pathway?ko00410
Glycine, serine and threonine metabolism	KEGG PATHWAY	ko00260	14	97	0.144329897	0.451722888	1	comp28077_c0|comp47132_c0|comp43553_c0|comp45791_c0|comp37482_c0|comp30248_c0|comp40833_c0|comp40606_c0|comp40058_c0|comp47603_c0|comp32651_c0|comp45693_c0|comp46023_c0|comp38534_c0	http://www.genome.jp/kegg-bin/show_pathway?ko00260
Styrene degradation	KEGG PATHWAY	ko00643	2	11	0.181818182	0.453747886	1	comp33601_c0|comp43715_c0	http://www.genome.jp/kegg-bin/show_pathway?ko00643
Leukocyte transendothelial migration	KEGG PATHWAY	ko04670	6	40	0.15	0.467744712	1	comp19859_c0|comp21676_c0|comp18615_c0|comp83781_c0|comp36139_c1|comp36139_c0	http://www.genome.jp/kegg-bin/show_pathway?ko04670
Ubiquinone and other terpenoid-quinone biosynthesis	KEGG PATHWAY	ko00130	5	33	0.151515152	0.473721102	1	comp46386_c0|comp33100_c0|comp47032_c3|comp48015_c0|comp46683_c0	http://www.genome.jp/kegg-bin/show_pathway?ko00130
Protein processing in endoplasmic reticulum	KEGG PATHWAY	ko04141	44	319	0.137931034	0.488775697	1	comp45830_c0|comp32165_c0|comp41364_c0|comp17780_c0|comp36306_c0|comp31985_c0|comp40486_c1|comp46169_c1|comp46169_c0|comp9119_c0|comp145380_c0|comp35814_c0|comp29657_c0|comp41585_c0|comp47364_c0|comp37753_c0|comp100044_c0|comp44992_c0|comp32905_c0|comp41242_c0|comp27912_c0|comp32174_c0|comp31905_c1|comp31905_c0|comp44141_c0|comp40194_c0|comp62240_c0|comp31982_c0|comp24082_c0|comp2128_c0|comp20293…	http://www.genome.jp/kegg-bin/show_pathway?ko04141
Bacterial secretion system	KEGG PATHWAY	ko03070	2	12	0.166666667	0.500958552	1	comp42880_c0|comp34510_c0	http://www.genome.jp/kegg-bin/show_pathway?ko03070
Galactose metabolism	KEGG PATHWAY	ko00052	12	86	0.139534884	0.511489234	1	comp40885_c0|comp39393_c0|comp42871_c0|comp44067_c0|comp33645_c1|comp42125_c0|comp46857_c1|comp45748_c0|comp48323_c1|comp44049_c0|comp38771_c1|comp38771_c0	http://www.genome.jp/kegg-bin/show_pathway?ko00052
Adipocytokine signaling pathway	KEGG PATHWAY	ko04920	6	42	0.142857143	0.517379464	1	comp44701_c0|comp46237_c0|comp140116_c0|comp40757_c2|comp45229_c0|comp40902_c0	http://www.genome.jp/kegg-bin/show_pathway?ko04920
Betalain biosynthesis	KEGG PATHWAY	ko00965	1	5	0.2	0.519118912	1	comp25646_c0	http://www.genome.jp/kegg-bin/show_pathway?ko00965
Phagosome	KEGG PATHWAY	ko04145	22	162	0.135802469	0.540809284	1	comp49254_c0|comp44141_c0|comp35814_c0|comp37927_c0|comp42321_c0|comp46156_c1|comp141363_c0|comp45776_c0|comp41391_c0|comp31818_c0|comp46447_c1|comp36139_c1|comp36139_c0|comp31982_c0|comp35179_c0|comp31498_c0|comp84850_c0|comp43786_c0|comp19302_c1|comp46397_c0|comp48886_c0|comp20481_c0	http://www.genome.jp/kegg-bin/show_pathway?ko04145
RIG-I-like receptor signaling pathway	KEGG PATHWAY	ko04622	2	13	0.153846154	0.545447803	1	comp44643_c0|comp39144_c0	http://www.genome.jp/kegg-bin/show_pathway?ko04622
Endocytosis	KEGG PATHWAY	ko04144	21	155	0.135483871	0.546079905	1	comp42069_c0|comp45054_c1|comp45977_c0|comp100044_c0|comp2128_c0|comp47939_c3|comp44987_c0|comp48578_c0|comp49254_c0|comp18204_c0|comp47835_c1|comp40486_c1|comp41975_c0|comp46169_c1|comp46169_c0|comp17532_c0|comp46310_c0|comp16356_c0|comp40194_c0|comp45686_c0|comp31384_c1	http://www.genome.jp/kegg-bin/show_pathway?ko04144
Other types of O-glycan biosynthesis	KEGG PATHWAY	ko00514	1	6	0.166666667	0.584631888	1	comp46910_c0	http://www.genome.jp/kegg-bin/show_pathway?ko00514
Phosphonate and phosphinate metabolism	KEGG PATHWAY	ko00440	1	6	0.166666667	0.584631888	1	comp36380_c0	http://www.genome.jp/kegg-bin/show_pathway?ko00440
Lipopolysaccharide biosynthesis	KEGG PATHWAY	ko00540	1	6	0.166666667	0.584631888	1	comp44421_c0	http://www.genome.jp/kegg-bin/show_pathway?ko00540
Novobiocin biosynthesis	KEGG PATHWAY	ko00401	1	6	0.166666667	0.584631888	1	comp47032_c3	http://www.genome.jp/kegg-bin/show_pathway?ko00401
Taste transduction	KEGG PATHWAY	ko04742	1	6	0.166666667	0.584631888	1	comp43811_c1	http://www.genome.jp/kegg-bin/show_pathway?ko04742
Diterpenoid biosynthesis	KEGG PATHWAY	ko00904	2	14	0.142857143	0.587080983	1	comp28667_c0|comp31061_c1	http://www.genome.jp/kegg-bin/show_pathway?ko00904
mTOR signaling pathway	KEGG PATHWAY	ko04150	5	38	0.131578947	0.604603604	1	comp46758_c0|comp32676_c0|comp26151_c0|comp44718_c1|comp46237_c0	http://www.genome.jp/kegg-bin/show_pathway?ko04150
Tryptophan metabolism	KEGG PATHWAY	ko00380	9	69	0.130434783	0.608753311	1	comp33512_c0|comp20975_c0|comp29335_c0|comp34236_c0|comp46839_c0|comp41283_c1|comp120063_c0|comp41283_c0|comp44351_c0	http://www.genome.jp/kegg-bin/show_pathway?ko00380
Phenylalanine metabolism	KEGG PATHWAY	ko00360	12	92	0.130434783	0.610234928	1	comp33315_c0|comp47032_c3|comp31133_c0|comp33231_c0|comp39821_c0|comp38250_c0|comp29276_c0|comp31047_c0|comp47603_c0|comp33100_c0|comp40264_c0|comp37760_c0	http://www.genome.jp/kegg-bin/show_pathway?ko00360
Cytosolic DNA-sensing pathway	KEGG PATHWAY	ko04623	3	23	0.130434783	0.623783677	1	comp48445_c0|comp46617_c0|comp47358_c1	http://www.genome.jp/kegg-bin/show_pathway?ko04623
Glycosylphosphatidylinositol(GPI)-anchor biosynthesis	KEGG PATHWAY	ko00563	3	23	0.130434783	0.623783677	1	comp44962_c1|comp41738_c0|comp39164_c0	http://www.genome.jp/kegg-bin/show_pathway?ko00563
Carotenoid biosynthesis	KEGG PATHWAY	ko00906	4	31	0.129032258	0.625421936	1	comp41187_c0|comp43141_c0|comp43568_c0|comp43452_c1	http://www.genome.jp/kegg-bin/show_pathway?ko00906
Cardiac muscle contraction	KEGG PATHWAY	ko04260	12	93	0.129032258	0.625762093	1	comp21460_c0|comp28461_c0|comp33826_c0|comp101372_c0|comp24450_c0|comp2158_c0|comp34371_c0|comp25923_c0|comp33826_c1|comp24450_c1|comp33402_c0|comp46583_c0	http://www.genome.jp/kegg-bin/show_pathway?ko04260
Synthesis and degradation of ketone bodies	KEGG PATHWAY	ko00072	2	15	0.133333333	0.625810548	1	comp41283_c1|comp41283_c0	http://www.genome.jp/kegg-bin/show_pathway?ko00072
Gastric acid secretion	KEGG PATHWAY	ko04971	4	32	0.125	0.651089267	1	comp36010_c0|comp20463_c0|comp101372_c0|comp73377_c0	http://www.genome.jp/kegg-bin/show_pathway?ko04971
RNA polymerase	KEGG PATHWAY	ko03020	5	40	0.125	0.651415744	1	comp48445_c0|comp41092_c0|comp46617_c0|comp46524_c0|comp47358_c1	http://www.genome.jp/kegg-bin/show_pathway?ko03020
Mismatch repair	KEGG PATHWAY	ko03430	5	40	0.125	0.651415744	1	comp46933_c0|comp44352_c0|comp48651_c0|comp34377_c0|comp48345_c0	http://www.genome.jp/kegg-bin/show_pathway?ko03430
Vascular smooth muscle contraction	KEGG PATHWAY	ko04270	6	48	0.125	0.653026343	1	comp151334_c0|comp19859_c0|comp20463_c0|comp36010_c0|comp83781_c0|comp73377_c0	http://www.genome.jp/kegg-bin/show_pathway?ko04270
Aminobenzoate degradation	KEGG PATHWAY	ko00627	2	16	0.125	0.661654854	1	comp20975_c0|comp39434_c0	http://www.genome.jp/kegg-bin/show_pathway?ko00627
Notch signaling pathway	KEGG PATHWAY	ko04330	2	16	0.125	0.661654854	1	comp46627_c0|comp44048_c0	http://www.genome.jp/kegg-bin/show_pathway?ko04330
Basal transcription factors	KEGG PATHWAY	ko03022	5	41	0.12195122	0.673450614	1	comp47839_c1|comp116773_c0|comp44032_c0|comp45432_c1|comp44754_c0	http://www.genome.jp/kegg-bin/show_pathway?ko03022
Spliceosome	KEGG PATHWAY	ko03040	26	204	0.12745098	0.673511615	1	comp40125_c0|comp40486_c1|comp41261_c0|comp46169_c1|comp46169_c0|comp47692_c0|comp100044_c0|comp47419_c0|comp40194_c0|comp36998_c0|comp39897_c0|comp46317_c0|comp42858_c0|comp48142_c0|comp26049_c0|comp2128_c0|comp34205_c0|comp17587_c0|comp48597_c0|comp46632_c0|comp46968_c1|comp47797_c0|comp82490_c0|comp47756_c1|comp48261_c0|comp46590_c0	http://www.genome.jp/kegg-bin/show_pathway?ko03040
Non-homologous end-joining	KEGG PATHWAY	ko03450	1	8	0.125	0.690106853	1	comp48671_c1	http://www.genome.jp/kegg-bin/show_pathway?ko03450
Carbon fixation pathways in prokaryotes	KEGG PATHWAY	ko00720	8	67	0.119402985	0.70884028	1	comp39407_c0|comp40632_c0|comp42505_c0|comp42505_c1|comp36682_c0|comp41283_c1|comp41283_c0|comp34580_c0	http://www.genome.jp/kegg-bin/show_pathway?ko00720
Sulfur relay system	KEGG PATHWAY	ko04122	1	9	0.111111111	0.732332689	1	comp33793_c0	http://www.genome.jp/kegg-bin/show_pathway?ko04122
Base excision repair	KEGG PATHWAY	ko03410	5	44	0.113636364	0.733851695	1	comp46933_c0|comp108578_c0|comp28610_c0|comp45879_c0|comp45821_c0	http://www.genome.jp/kegg-bin/show_pathway?ko03410
Purine metabolism	KEGG PATHWAY	ko00230	25	204	0.12254902	0.745656275	1	comp43881_c2|comp47358_c1|comp34390_c2|comp43670_c0|comp33654_c0|comp35215_c0|comp42627_c0|comp101824_c0|comp43149_c0|comp42551_c0|comp32915_c0|comp31998_c0|comp46524_c0|comp34390_c0|comp34390_c1|comp46857_c1|comp41012_c0|comp43638_c0|comp41092_c0|comp48445_c0|comp46779_c0|comp45975_c0|comp45879_c0|comp70786_c0|comp46617_c0	http://www.genome.jp/kegg-bin/show_pathway?ko00230
Glycerophospholipid metabolism	KEGG PATHWAY	ko00564	11	94	0.117021277	0.75014146	1	comp39676_c0|comp39269_c0|comp42419_c0|comp35580_c0|comp43198_c0|comp46377_c0|comp36664_c0|comp41915_c0|comp42960_c0|comp36380_c0|comp39206_c0	http://www.genome.jp/kegg-bin/show_pathway?ko00564
Circadian rhythm	KEGG PATHWAY	ko04710	3	28	0.107142857	0.754625194	1	comp40757_c2|comp46852_c0|comp20293_c0	http://www.genome.jp/kegg-bin/show_pathway?ko04710
Circadian entrainment	KEGG PATHWAY	ko04713	4	37	0.108108108	0.761228324	1	comp36010_c0|comp20463_c0|comp73377_c0|comp43811_c1	http://www.genome.jp/kegg-bin/show_pathway?ko04713
Tight junction	KEGG PATHWAY	ko04530	10	87	0.114942529	0.763753064	1	comp45477_c0|comp19859_c0|comp21676_c0|comp18615_c0|comp36801_c1|comp36801_c0|comp107385_c0|comp83781_c0|comp36139_c1|comp36139_c0	http://www.genome.jp/kegg-bin/show_pathway?ko04530
Glycosaminoglycan degradation	KEGG PATHWAY	ko00531	1	10	0.1	0.768807006	1	comp45601_c0	http://www.genome.jp/kegg-bin/show_pathway?ko00531
Brassinosteroid biosynthesis	KEGG PATHWAY	ko00905	1	10	0.1	0.768807006	1	comp42986_c0	http://www.genome.jp/kegg-bin/show_pathway?ko00905
Regulation of autophagy	KEGG PATHWAY	ko04140	2	20	0.1	0.777988895	1	comp45776_c0|comp87556_c0	http://www.genome.jp/kegg-bin/show_pathway?ko04140
Nucleotide excision repair	KEGG PATHWAY	ko03420	7	64	0.109375	0.786406345	1	comp48257_c0|comp44754_c0|comp46044_c0|comp44352_c0|comp34377_c0|comp45879_c0|comp46933_c0	http://www.genome.jp/kegg-bin/show_pathway?ko03420
Protein digestion and absorption	KEGG PATHWAY	ko04974	4	39	0.102564103	0.796934521	1	comp37065_c0|comp101372_c0|comp38540_c0|comp46311_c1	http://www.genome.jp/kegg-bin/show_pathway?ko04974
NF-kappa B signaling pathway	KEGG PATHWAY	ko04064	1	11	0.090909091	0.800312918	1	comp45477_c0	http://www.genome.jp/kegg-bin/show_pathway?ko04064
Riboflavin metabolism	KEGG PATHWAY	ko00740	1	11	0.090909091	0.800312918	1	comp31581_c0	http://www.genome.jp/kegg-bin/show_pathway?ko00740
Cutin, suberine and wax biosynthesis	KEGG PATHWAY	ko00073	2	21	0.095238095	0.800969955	1	comp39385_c0|comp31771_c0	http://www.genome.jp/kegg-bin/show_pathway?ko00073
Propanoate metabolism	KEGG PATHWAY	ko00640	9	82	0.109756098	0.802754644	1	comp33512_c0|comp20975_c0|comp29335_c0|comp37873_c0|comp41283_c1|comp120063_c0|comp41283_c0|comp45890_c0|comp44351_c0	http://www.genome.jp/kegg-bin/show_pathway?ko00640
Fat digestion and absorption	KEGG PATHWAY	ko04975	1	12	0.083333333	0.827526951	1	comp42022_c0	http://www.genome.jp/kegg-bin/show_pathway?ko04975
MAPK signaling pathway	KEGG PATHWAY	ko04010	8	76	0.105263158	0.829866376	1	comp24423_c0|comp100044_c0|comp120435_c0|comp40486_c1|comp2128_c0|comp46169_c1|comp46169_c0|comp40194_c0	http://www.genome.jp/kegg-bin/show_pathway?ko04010
Proximal tubule bicarbonate reclamation	KEGG PATHWAY	ko04964	3	32	0.09375	0.830612493	1	comp101372_c0|comp27076_c1|comp27076_c0	http://www.genome.jp/kegg-bin/show_pathway?ko04964
Selenocompound metabolism	KEGG PATHWAY	ko00450	3	32	0.09375	0.830612493	1	comp18282_c0|comp43638_c0|comp32869_c0	http://www.genome.jp/kegg-bin/show_pathway?ko00450
Lysine degradation	KEGG PATHWAY	ko00310	8	77	0.103896104	0.840477788	1	comp33512_c0|comp20975_c0|comp29335_c0|comp41283_c1|comp43092_c1|comp120063_c0|comp41283_c0|comp44351_c0	http://www.genome.jp/kegg-bin/show_pathway?ko00310
Adherens junction	KEGG PATHWAY	ko04520	5	51	0.098039216	0.84214134	1	comp18615_c0|comp21676_c0|comp45477_c0|comp36139_c1|comp36139_c0	http://www.genome.jp/kegg-bin/show_pathway?ko04520
Pyrimidine metabolism	KEGG PATHWAY	ko00240	15	137	0.109489051	0.85179392	1	comp42446_c0|comp47358_c1|comp41092_c0|comp46957_c0|comp46524_c0|comp43670_c0|comp33654_c0|comp47467_c0|comp48445_c0|comp45281_c2|comp43149_c0|comp45975_c0|comp45879_c0|comp70786_c0|comp46617_c0	http://www.genome.jp/kegg-bin/show_pathway?ko00240
p53 signaling pathway	KEGG PATHWAY	ko04115	4	43	0.093023256	0.855356851	1	comp22377_c0|comp47764_c0|comp32486_c0|comp44286_c0	http://www.genome.jp/kegg-bin/show_pathway?ko04115
Retrograde endocannabinoid signaling	KEGG PATHWAY	ko04723	2	24	0.083333333	0.857702775	1	comp48168_c3|comp43811_c1	http://www.genome.jp/kegg-bin/show_pathway?ko04723
One carbon pool by folate	KEGG PATHWAY	ko00670	3	34	0.088235294	0.860375077	1	comp47132_c0|comp40833_c0|comp40606_c0	http://www.genome.jp/kegg-bin/show_pathway?ko00670
SNARE interactions in vesicular transport	KEGG PATHWAY	ko04130	3	34	0.088235294	0.860375077	1	comp44805_c0|comp48472_c0|comp46156_c1	http://www.genome.jp/kegg-bin/show_pathway?ko04130
Caprolactam degradation	KEGG PATHWAY	ko00930	1	14	0.071428571	0.87133759	1	comp20975_c0	http://www.genome.jp/kegg-bin/show_pathway?ko00930
Protein export	KEGG PATHWAY	ko03060	6	63	0.095238095	0.875333962	1	comp42880_c0|comp84850_c0|comp34510_c0|comp9119_c0|comp48672_c0|comp40439_c0	http://www.genome.jp/kegg-bin/show_pathway?ko03060
Progesterone-mediated oocyte maturation	KEGG PATHWAY	ko04914	6	63	0.095238095	0.875333962	1	comp17979_c0|comp32486_c0|comp47538_c0|comp31905_c1|comp31905_c0|comp43924_c0	http://www.genome.jp/kegg-bin/show_pathway?ko04914
Salivary secretion	KEGG PATHWAY	ko04970	4	45	0.088888889	0.878769484	1	comp36010_c0|comp20463_c0|comp101372_c0|comp73377_c0	http://www.genome.jp/kegg-bin/show_pathway?ko04970
Phenylpropanoid biosynthesis	KEGG PATHWAY	ko00940	10	101	0.099009901	0.89658397	1	comp33315_c0|comp31133_c0|comp33231_c0|comp43323_c0|comp38250_c0|comp29276_c0|comp31047_c0|comp40264_c0|comp33100_c0|comp48286_c0	http://www.genome.jp/kegg-bin/show_pathway?ko00940
Long-term potentiation	KEGG PATHWAY	ko04720	4	47	0.085106383	0.898819948	1	comp36010_c0|comp20463_c0|comp73377_c0|comp151334_c0	http://www.genome.jp/kegg-bin/show_pathway?ko04720
Lysine biosynthesis	KEGG PATHWAY	ko00300	2	27	0.074074074	0.89926685	1	comp44584_c0|comp43139_c0	http://www.genome.jp/kegg-bin/show_pathway?ko00300
Vasopressin-regulated water reabsorption	KEGG PATHWAY	ko04962	2	27	0.074074074	0.89926685	1	comp37410_c0|comp41898_c0	http://www.genome.jp/kegg-bin/show_pathway?ko04962
Pancreatic secretion	KEGG PATHWAY	ko04972	6	66	0.090909091	0.901215052	1	comp91047_c0|comp42978_c0|comp40317_c0|comp101372_c0|comp29646_c0|comp29646_c2	http://www.genome.jp/kegg-bin/show_pathway?ko04972
Focal adhesion	KEGG PATHWAY	ko04510	9	93	0.096774194	0.901673126	1	comp120435_c0|comp151334_c0|comp19859_c0|comp21676_c0|comp18615_c0|comp83781_c0|comp31384_c1|comp36139_c1|comp36139_c0	http://www.genome.jp/kegg-bin/show_pathway?ko04510
PI3K-Akt signaling pathway	KEGG PATHWAY	ko04151	13	131	0.099236641	0.91904219	1	comp26151_c0|comp36098_c0|comp31905_c1|comp46237_c0|comp43811_c1|comp46758_c0|comp16357_c0|comp36271_c0|comp32486_c0|comp31905_c0|comp145380_c0|comp48426_c0|comp32676_c0	http://www.genome.jp/kegg-bin/show_pathway?ko04151
Butanoate metabolism	KEGG PATHWAY	ko00650	4	50	0.08	0.923414861	1	comp37241_c0|comp41283_c1|comp20975_c0|comp41283_c0	http://www.genome.jp/kegg-bin/show_pathway?ko00650
Endocrine and other factor-regulated calcium reabsorption	KEGG PATHWAY	ko04961	4	50	0.08	0.923414861	1	comp45054_c1|comp48578_c0|comp101372_c0|comp45977_c0	http://www.genome.jp/kegg-bin/show_pathway?ko04961
Cell cycle	KEGG PATHWAY	ko04110	14	141	0.09929078	0.925281099	1	comp17979_c0|comp39886_c0|comp28218_c0|comp47538_c0|comp44747_c0|comp44080_c0|comp45865_c0|comp20293_c0|comp16357_c0|comp44724_c0|comp32486_c0|comp44048_c0|comp43924_c0|comp36271_c0	http://www.genome.jp/kegg-bin/show_pathway?ko04110
Oocyte meiosis	KEGG PATHWAY	ko04114	12	125	0.096	0.931680145	1	comp47538_c0|comp151334_c0|comp45865_c0|comp20463_c0|comp16357_c0|comp44724_c0|comp20293_c0|comp32486_c0|comp43924_c0|comp36010_c0|comp73377_c0|comp36271_c0	http://www.genome.jp/kegg-bin/show_pathway?ko04114
RNA degradation	KEGG PATHWAY	ko03018	12	127	0.094488189	0.939939714	1	comp46748_c0|comp17587_c0|comp46968_c1|comp34688_c0|comp48182_c1|comp19249_c0|comp81573_c0|comp48230_c3|comp25156_c0|comp41302_c0|comp44785_c0|comp46483_c2	http://www.genome.jp/kegg-bin/show_pathway?ko03018
Glutamatergic synapse	KEGG PATHWAY	ko04724	5	63	0.079365079	0.942775062	1	comp25569_c0|comp24936_c0|comp32640_c1|comp20477_c0|comp43811_c1	http://www.genome.jp/kegg-bin/show_pathway?ko04724
ErbB signaling pathway	KEGG PATHWAY	ko04012	2	32	0.0625	0.944346741	1	comp46758_c0|comp46237_c0	http://www.genome.jp/kegg-bin/show_pathway?ko04012
Melanogenesis	KEGG PATHWAY	ko04916	3	44	0.068181818	0.950091358	1	comp36010_c0|comp20463_c0|comp73377_c0	http://www.genome.jp/kegg-bin/show_pathway?ko04916
Sphingolipid metabolism	KEGG PATHWAY	ko00600	3	44	0.068181818	0.950091358	1	comp45748_c0|comp91397_c0|comp48010_c0	http://www.genome.jp/kegg-bin/show_pathway?ko00600
Streptomycin biosynthesis	KEGG PATHWAY	ko00521	1	21	0.047619048	0.953880867	1	comp46857_c1	http://www.genome.jp/kegg-bin/show_pathway?ko00521
RNA transport	KEGG PATHWAY	ko03013	21	213	0.098591549	0.961243284	1	comp44428_c0|comp47419_c0|comp18103_c1|comp19740_c0|comp44568_c0|comp37381_c0|comp36807_c0|comp46157_c0|comp47837_c0|comp82490_c0|comp46847_c1|comp46264_c0|comp32676_c0|comp20797_c0|comp44843_c0|comp45700_c0|comp48597_c0|comp17796_c0|comp23551_c0|comp34534_c0|comp44084_c0	http://www.genome.jp/kegg-bin/show_pathway?ko03013
Neurotrophin signaling pathway	KEGG PATHWAY	ko04722	4	58	0.068965517	0.964895755	1	comp36010_c0|comp20463_c0|comp73377_c0|comp36271_c0	http://www.genome.jp/kegg-bin/show_pathway?ko04722
Collecting duct acid secretion	KEGG PATHWAY	ko04966	4	58	0.068965517	0.964895755	1	comp41391_c0|comp35179_c0|comp141363_c0|comp20481_c0	http://www.genome.jp/kegg-bin/show_pathway?ko04966
Bile secretion	KEGG PATHWAY	ko04976	4	58	0.068965517	0.964895755	1	comp47224_c0|comp41752_c0|comp101372_c0|comp42192_c0	http://www.genome.jp/kegg-bin/show_pathway?ko04976
Aminoacyl-tRNA biosynthesis	KEGG PATHWAY	ko00970	4	59	0.06779661	0.968264804	1	comp44514_c0|comp46195_c0|comp41295_c0|comp45298_c0	http://www.genome.jp/kegg-bin/show_pathway?ko00970
Fc gamma R-mediated phagocytosis	KEGG PATHWAY	ko04666	7	90	0.077777778	0.970007458	1	comp41975_c0|comp18204_c0|comp46758_c0|comp73226_c0|comp46361_c0|comp45686_c0|comp45977_c0	http://www.genome.jp/kegg-bin/show_pathway?ko04666
Apoptosis	KEGG PATHWAY	ko04210	1	24	0.041666667	0.970292796	1	comp22377_c0	http://www.genome.jp/kegg-bin/show_pathway?ko04210
Ubiquitin mediated proteolysis	KEGG PATHWAY	ko04120	14	156	0.08974359	0.971053628	1	comp17979_c0|comp47538_c0|comp62240_c0|comp38124_c1|comp38124_c0|comp44719_c0|comp27912_c0|comp20293_c0|comp44724_c0|comp44318_c5|comp43924_c0|comp29657_c0|comp47764_c0|comp44286_c0	http://www.genome.jp/kegg-bin/show_pathway?ko04120
Homologous recombination	KEGG PATHWAY	ko03440	3	49	0.06122449	0.97107565	1	comp45879_c0|comp47477_c0|comp34377_c0	http://www.genome.jp/kegg-bin/show_pathway?ko03440
Gap junction	KEGG PATHWAY	ko04540	3	49	0.06122449	0.97107565	1	comp37927_c0|comp31818_c0|comp42321_c0	http://www.genome.jp/kegg-bin/show_pathway?ko04540
HIF-1 signaling pathway	KEGG PATHWAY	ko04066	7	91	0.076923077	0.972461192	1	comp37243_c0|comp26151_c0|comp46237_c0|comp46758_c0|comp32676_c0|comp16637_c0|comp41302_c0	http://www.genome.jp/kegg-bin/show_pathway?ko04066
Serotonergic synapse	KEGG PATHWAY	ko04726	1	25	0.04	0.974344494	1	comp43811_c1	http://www.genome.jp/kegg-bin/show_pathway?ko04726
Meiosis	KEGG PATHWAY	ko04113	8	102	0.078431373	0.975155792	1	comp47538_c0|comp151334_c0|comp31699_c0|comp45865_c0|comp44724_c0|comp45877_c0|comp43924_c0|comp47820_c0	http://www.genome.jp/kegg-bin/show_pathway?ko04113
Citrate cycle (TCA cycle)	KEGG PATHWAY	ko00020	11	132	0.083333333	0.97766302	1	comp39407_c0|comp91477_c0|comp38978_c0|comp40922_c0|comp42505_c0|comp40632_c0|comp28077_c0|comp36682_c0|comp42505_c1|comp24401_c0|comp36545_c0	http://www.genome.jp/kegg-bin/show_pathway?ko00020
Insulin signaling pathway	KEGG PATHWAY	ko04910	14	160	0.0875	0.977935792	1	comp24339_c0|comp151334_c0|comp46237_c0|comp48310_c0|comp40757_c2|comp46758_c0|comp20463_c0|comp32676_c0|comp26151_c0|comp36010_c0|comp37629_c0|comp48187_c2|comp73377_c0|comp25331_c0	http://www.genome.jp/kegg-bin/show_pathway?ko04910
Dopaminergic synapse	KEGG PATHWAY	ko04728	5	75	0.066666667	0.981497038	1	comp151334_c0|comp36010_c0|comp20463_c0|comp73377_c0|comp43811_c1	http://www.genome.jp/kegg-bin/show_pathway?ko04728
Various types of N-glycan biosynthesis	KEGG PATHWAY	ko00513	2	41	0.048780488	0.981645009	1	comp41828_c0|comp41356_c0	http://www.genome.jp/kegg-bin/show_pathway?ko00513
Ether lipid metabolism	KEGG PATHWAY	ko00565	2	41	0.048780488	0.981645009	1	comp42960_c0|comp39676_c0	http://www.genome.jp/kegg-bin/show_pathway?ko00565
Aldosterone-regulated sodium reabsorption	KEGG PATHWAY	ko04960	1	28	0.035714286	0.983476092	1	comp101372_c0	http://www.genome.jp/kegg-bin/show_pathway?ko04960
DNA replication	KEGG PATHWAY	ko03030	4	66	0.060606061	0.984619833	1	comp46933_c0|comp44352_c0|comp34377_c0|comp45879_c0	http://www.genome.jp/kegg-bin/show_pathway?ko03030
N-Glycan biosynthesis	KEGG PATHWAY	ko00510	3	55	0.054545455	0.985283625	1	comp41828_c0|comp47512_c1|comp41356_c0	http://www.genome.jp/kegg-bin/show_pathway?ko00510
Cholinergic synapse	KEGG PATHWAY	ko04725	1	29	0.034482759	0.985730281	1	comp43811_c1	http://www.genome.jp/kegg-bin/show_pathway?ko04725
ABC transporters	KEGG PATHWAY	ko02010	2	45	0.044444444	0.988931918	1	comp42192_c0|comp47224_c0	http://www.genome.jp/kegg-bin/show_pathway?ko02010
GnRH signaling pathway	KEGG PATHWAY	ko04912	3	58	0.051724138	0.989580263	1	comp36010_c0|comp20463_c0|comp73377_c0	http://www.genome.jp/kegg-bin/show_pathway?ko04912
Oxidative phosphorylation	KEGG PATHWAY	ko00190	29	309	0.093851133	0.991138604	1	comp21460_c0|comp40922_c0|comp33826_c0|comp34371_c0|comp95615_c0|comp44695_c0|comp33402_c0|comp41391_c0|comp49127_c0|comp47598_c1|comp2158_c0|comp33826_c1|comp30939_c0|comp141363_c0|comp28383_c0|comp46583_c0|comp29829_c0|comp25923_c0|comp10773_c0|comp70522_c0|comp39636_c0|comp44714_c0|comp49983_c0|comp48200_c2|comp35179_c0|comp36913_c0|comp17674_c0|comp20481_c0|comp41404_c1	http://www.genome.jp/kegg-bin/show_pathway?ko00190
Synaptic vesicle cycle	KEGG PATHWAY	ko04721	7	107	0.065420561	0.993484169	1	comp41391_c0|comp45054_c1|comp35179_c0|comp48578_c0|comp141363_c0|comp45977_c0|comp20481_c0	http://www.genome.jp/kegg-bin/show_pathway?ko04721
Axon guidance	KEGG PATHWAY	ko04360	2	52	0.038461538	0.99549871	1	comp73226_c0|comp46361_c0	http://www.genome.jp/kegg-bin/show_pathway?ko04360
Fatty acid biosynthesis	KEGG PATHWAY	ko00061	4	78	0.051282051	0.995824345	1	comp38103_c0|comp42661_c1|comp45910_c0|comp48916_c0	http://www.genome.jp/kegg-bin/show_pathway?ko00061
TGF-beta signaling pathway	KEGG PATHWAY	ko04350	2	54	0.037037037	0.996529111	1	comp46758_c0|comp20293_c0	http://www.genome.jp/kegg-bin/show_pathway?ko04350
mRNA surveillance pathway	KEGG PATHWAY	ko03015	8	127	0.062992126	0.997311967	1	comp48551_c0|comp48516_c0|comp151334_c0|comp47419_c0|comp82490_c0|comp46366_c0|comp17796_c0|comp48141_c4	http://www.genome.jp/kegg-bin/show_pathway?ko03015
Fanconi anemia pathway	KEGG PATHWAY	ko03460	2	56	0.035714286	0.997326679	1	comp46044_c0|comp34377_c0	http://www.genome.jp/kegg-bin/show_pathway?ko03460
Carbohydrate digestion and absorption	KEGG PATHWAY	ko04973	1	44	0.022727273	0.998420681	1	comp101372_c0	http://www.genome.jp/kegg-bin/show_pathway?ko04973
Chemokine signaling pathway	KEGG PATHWAY	ko04062	1	45	0.022222222	0.998636335	1	comp43811_c1	http://www.genome.jp/kegg-bin/show_pathway?ko04062
Ribosome biogenesis in eukaryotes	KEGG PATHWAY	ko03008	8	148	0.054054054	0.999658854	1	comp32646_c0|comp48421_c2|comp45477_c0|comp42643_c0|comp36079_c0|comp48667_c1|comp48182_c1|comp18105_c0	http://www.genome.jp/kegg-bin/show_pathway?ko03008
Wnt signaling pathway	KEGG PATHWAY	ko04310	2	99	0.02020202	0.999991898	1	comp20293_c0|comp45477_c0	http://www.genome.jp/kegg-bin/show_pathway?ko04310
Proteasome	KEGG PATHWAY	ko03050	3	130	0.023076923	0.999998828	1	comp45368_c0|comp19422_c0|comp34061_c0	http://www.genome.jp/kegg-bin/show_pathway?ko03050
--------------------
#Term	Database	Id	Sample number	Background number		P-Value	Corrected P-Value	Genes	Hyperlink
--------------------
